# Supplementary material for: Diagnostic Strategies and Algorithms for Investigating Cancer Predisposition Syndromes in Children Presenting with Malignancy
Source: MDPI journal article supplement (doi:10.3390/cancers14153741), 2022-07-31
Supplement: s1 [file s1]

# Supplementary Materials: Diagnostic Strategies and Algorithms for Investigating Cancer Predisposition Syndromes in Children Presenting with Malignancy

Linda Rossini, Caterina Durante, Silvia Bresolin, Enrico Opocher, Antonio Marzollo and Alessandra Biffi

**Table S1.** List of malignancies requiring direct genetic referral following CCSC, JMC and MI-POGG

| CCSC                                                                   | JONGMANS                                                            | MIPOGG                                                    |
|------------------------------------------------------------------------|---------------------------------------------------------------------|-----------------------------------------------------------|
| Adrenocortical carcinoma                                               | Adrenocortical carcinoma / adenoma                                  | <b>SNC and ocular tumors</b>                              |
| Aggressive fibromatosis                                                | ALL (low hypodiploid)                                               | Atypical teratoid rhabdoid tumor                          |
| Atypical teratoid/rhabdoid tumor                                       | ALL (ring chromosome 21)                                            | Choroid plexus carcinoma                                  |
| Choroid plexus carcinoma                                               | ALL (Robertsonian translocation 15;21)                              | Dysplastic cerebellar gangliocytoma                       |
| Endolymphatic sac tumour                                               | ALL relapse ( <i>TP53</i> mutated)                                  | Endolymphatic sac tumor                                   |
| Gangliocytoma                                                          | AML (Monosomy 7)                                                    | Hemangioblastoma                                          |
| Hemangioblastoma                                                       | Basal cell carcinoma                                                | Optic pathway glioma                                      |
| Hepatoblastoma                                                         | Botryoid rhabdomyosarcoma of the urogenital tract (fusion-negative) | Pineoblastoma                                             |
| Hepatocellular carcinoma                                               | Chondromesenchymal hamartoma                                        | Pituitary adenoma                                         |
| JMML                                                                   | Choroid plexus carcinoma / tumor                                    | Retinoblastoma                                            |
| Medulloblastoma (not if known non-SHH subtype and the child is > 3 yo) | Colorectal carcinoma                                                | Subependymal giant cell astrocytoma                       |
| Meningioma                                                             | Cystic nephroma                                                     | Vestibular schwannoma                                     |
| MDS                                                                    | Endolymphatic sack tumor                                            | <b>Renal and neuroblastic tumors</b>                      |
| Nephroblastoma (Wilms tumor)                                           | Fetal rhabdomyoma                                                   | Cystic nephroma                                           |
| Optic nerve glioma                                                     | Gastrointestinal stromal tumor                                      | Renal angiomyolipoma                                      |
| Peripheral nerve sheath tumor                                          | Glioma of the optic pathway (with signs of NF1)                     | Renal cell carcinoma                                      |
| Pineoblastoma                                                          | Gonadoblastoma                                                      | Renal rhabdoid tumor                                      |
| Pituitary adenoma                                                      | Hemangioblastoma                                                    | <b>Bone and soft-tissue tumors</b>                        |
| Pituitary blastoma                                                     | Hepatoblastoma ( <i>CTNNB1</i> wildtype)                            | Desmoid tumor                                             |
| Renal carcinoma                                                        | Hepatocellular carcinoma                                            | Extrarenal rhabdoid tumor                                 |
| Retinoblastoma                                                         | Infantile myofibromatosis                                           | Gardner fibroma                                           |
| Rhabdomyosarcoma (not if the child is > 3 yo)                          | Juvenile myelomonocytic leukemia                                    | Malignant periphery nerve sheath tumor                    |
| Spinal ependymoma                                                      | Keratocystic odontogenic tumor                                      | Nasal chondromesenchymal hamartoma                        |
| Skin carcinoma                                                         | Large cell calcifying Sertoli-cell-tumor                            | <b>Other tumors</b>                                       |
| Subependymal giant cell astrocytoma                                    | Malignant peripheral nerve sheath tumor                             | Adrenocortical carcinoma                                  |
| Thyroid carcinoma                                                      | Medullary thyroid carcinoma                                         | Cardiac rhabdomyoma                                       |
| Vestibular schwannoma                                                  | Medulloblastoma (SHH activated)                                     | Colorectal carcinoma                                      |
| Adult tumors (e.g. carcinoma, pheochromocytoma)                        | Medulloblastoma (WNT activated, <i>CTNNB1</i> wildtype)             | Gastrointestinal stromal tumor                            |
|                                                                        | Medullary renal cell carcinoma                                      | Hepatoblastoma                                            |
|                                                                        | Medulloepithelioma                                                  | Medullary thyroid cancer,                                 |
|                                                                        | Melanoma                                                            | Ovarian Sertoli-Leydig cell tumor                         |
|                                                                        | Meningioma                                                          | Parathyroid tumor                                         |
|                                                                        | Myelodysplastic syndrome                                            | Pheochromocytoma,                                         |
|                                                                        | Myeloproliferative neoplasms (except CML)                           | Paraganglioma                                             |
|                                                                        | Myxoma                                                              | Pleuropulmonary blastoma                                  |
|                                                                        | Neuroendocrine tumor                                                | Trichilemmoma                                             |
|                                                                        | Paraganglioma / pheochromocytoma                                    | Small cell carcinoma of the ovary of hypercalcemic type   |
|                                                                        | Parathyroid carcinoma / adenoma                                     | Carcinoma of the breast, lung, cervix, uterus, or bladder |
|                                                                        | Pineoblastoma                                                       |                                                           |
|                                                                        | Pituitary adenoma / tumor                                           |                                                           |
|                                                                        | Pituitary blastoma                                                  |                                                           |
|                                                                        | Pleuropulmonary blastoma                                            |                                                           |
|                                                                        | Renal cell carcinoma                                                |                                                           |
|                                                                        | Retinoblastoma                                                      |                                                           |
|                                                                        | Rhabdoid tumor                                                      |                                                           |
|                                                                        | Rhabdomyosarcoma with diffuse anaplasia                             |                                                           |
|                                                                        | Schwannoma                                                          |                                                           |
|                                                                        | Schwannomatosis                                                     |                                                           |
|                                                                        | Sertoli-Leydig cell tumor                                           |                                                           |
|                                                                        | Sex cord stromal tumor with annular tubules                         |                                                           |
|                                                                        | Small cell carcin. of the ovary hypercalcemic type                  |                                                           |
|                                                                        | Squamous cell carcinoma                                             |                                                           |
|                                                                        | Subependymal giant cell astrocytoma                                 |                                                           |
|                                                                        | Thyroid carcinoma (non-medullary)                                   |                                                           |
|                                                                        | Transient myeloproliferative disease                                |                                                           |
